# Supplementary material
Source: PubMed Central journal article supplement (PMC10795773)

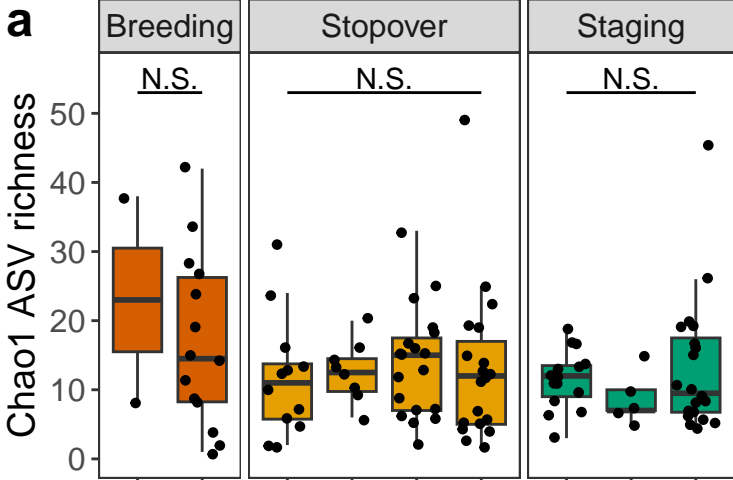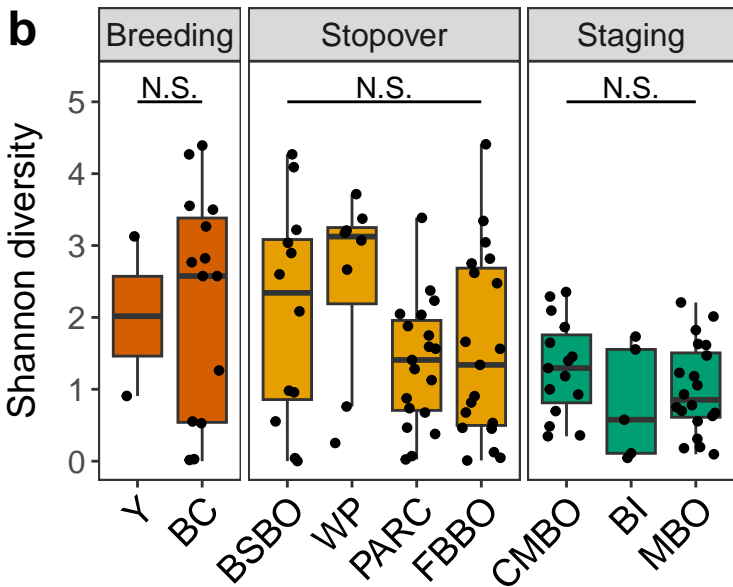

Supplement: NIHMS1931566-supplement-Fig_S1.pdf [file NIHMS1931566-supplement-Fig_S1.pdf]

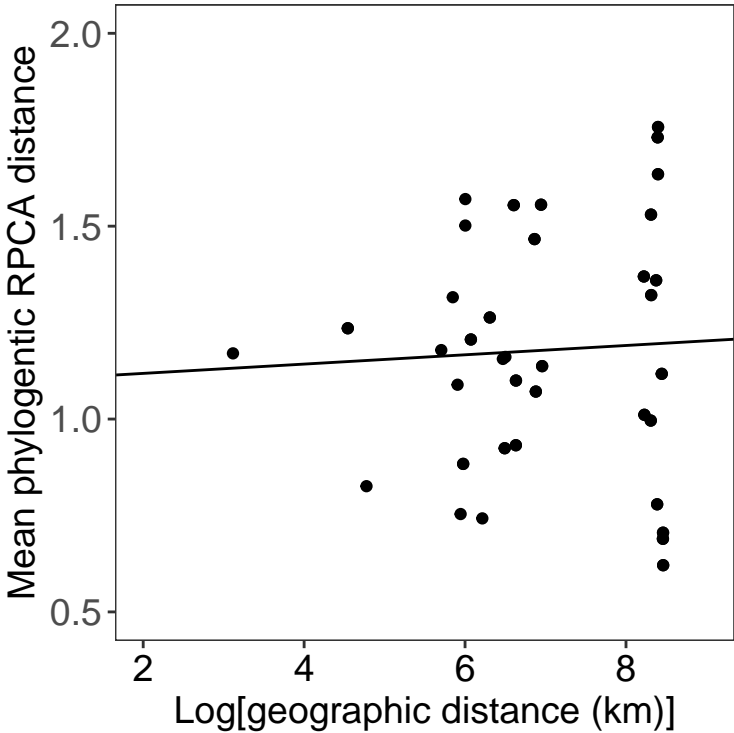

Supplement: NIHMS1931566-supplement-Fig_S2.pdf [file NIHMS1931566-supplement-Fig_S2.pdf]

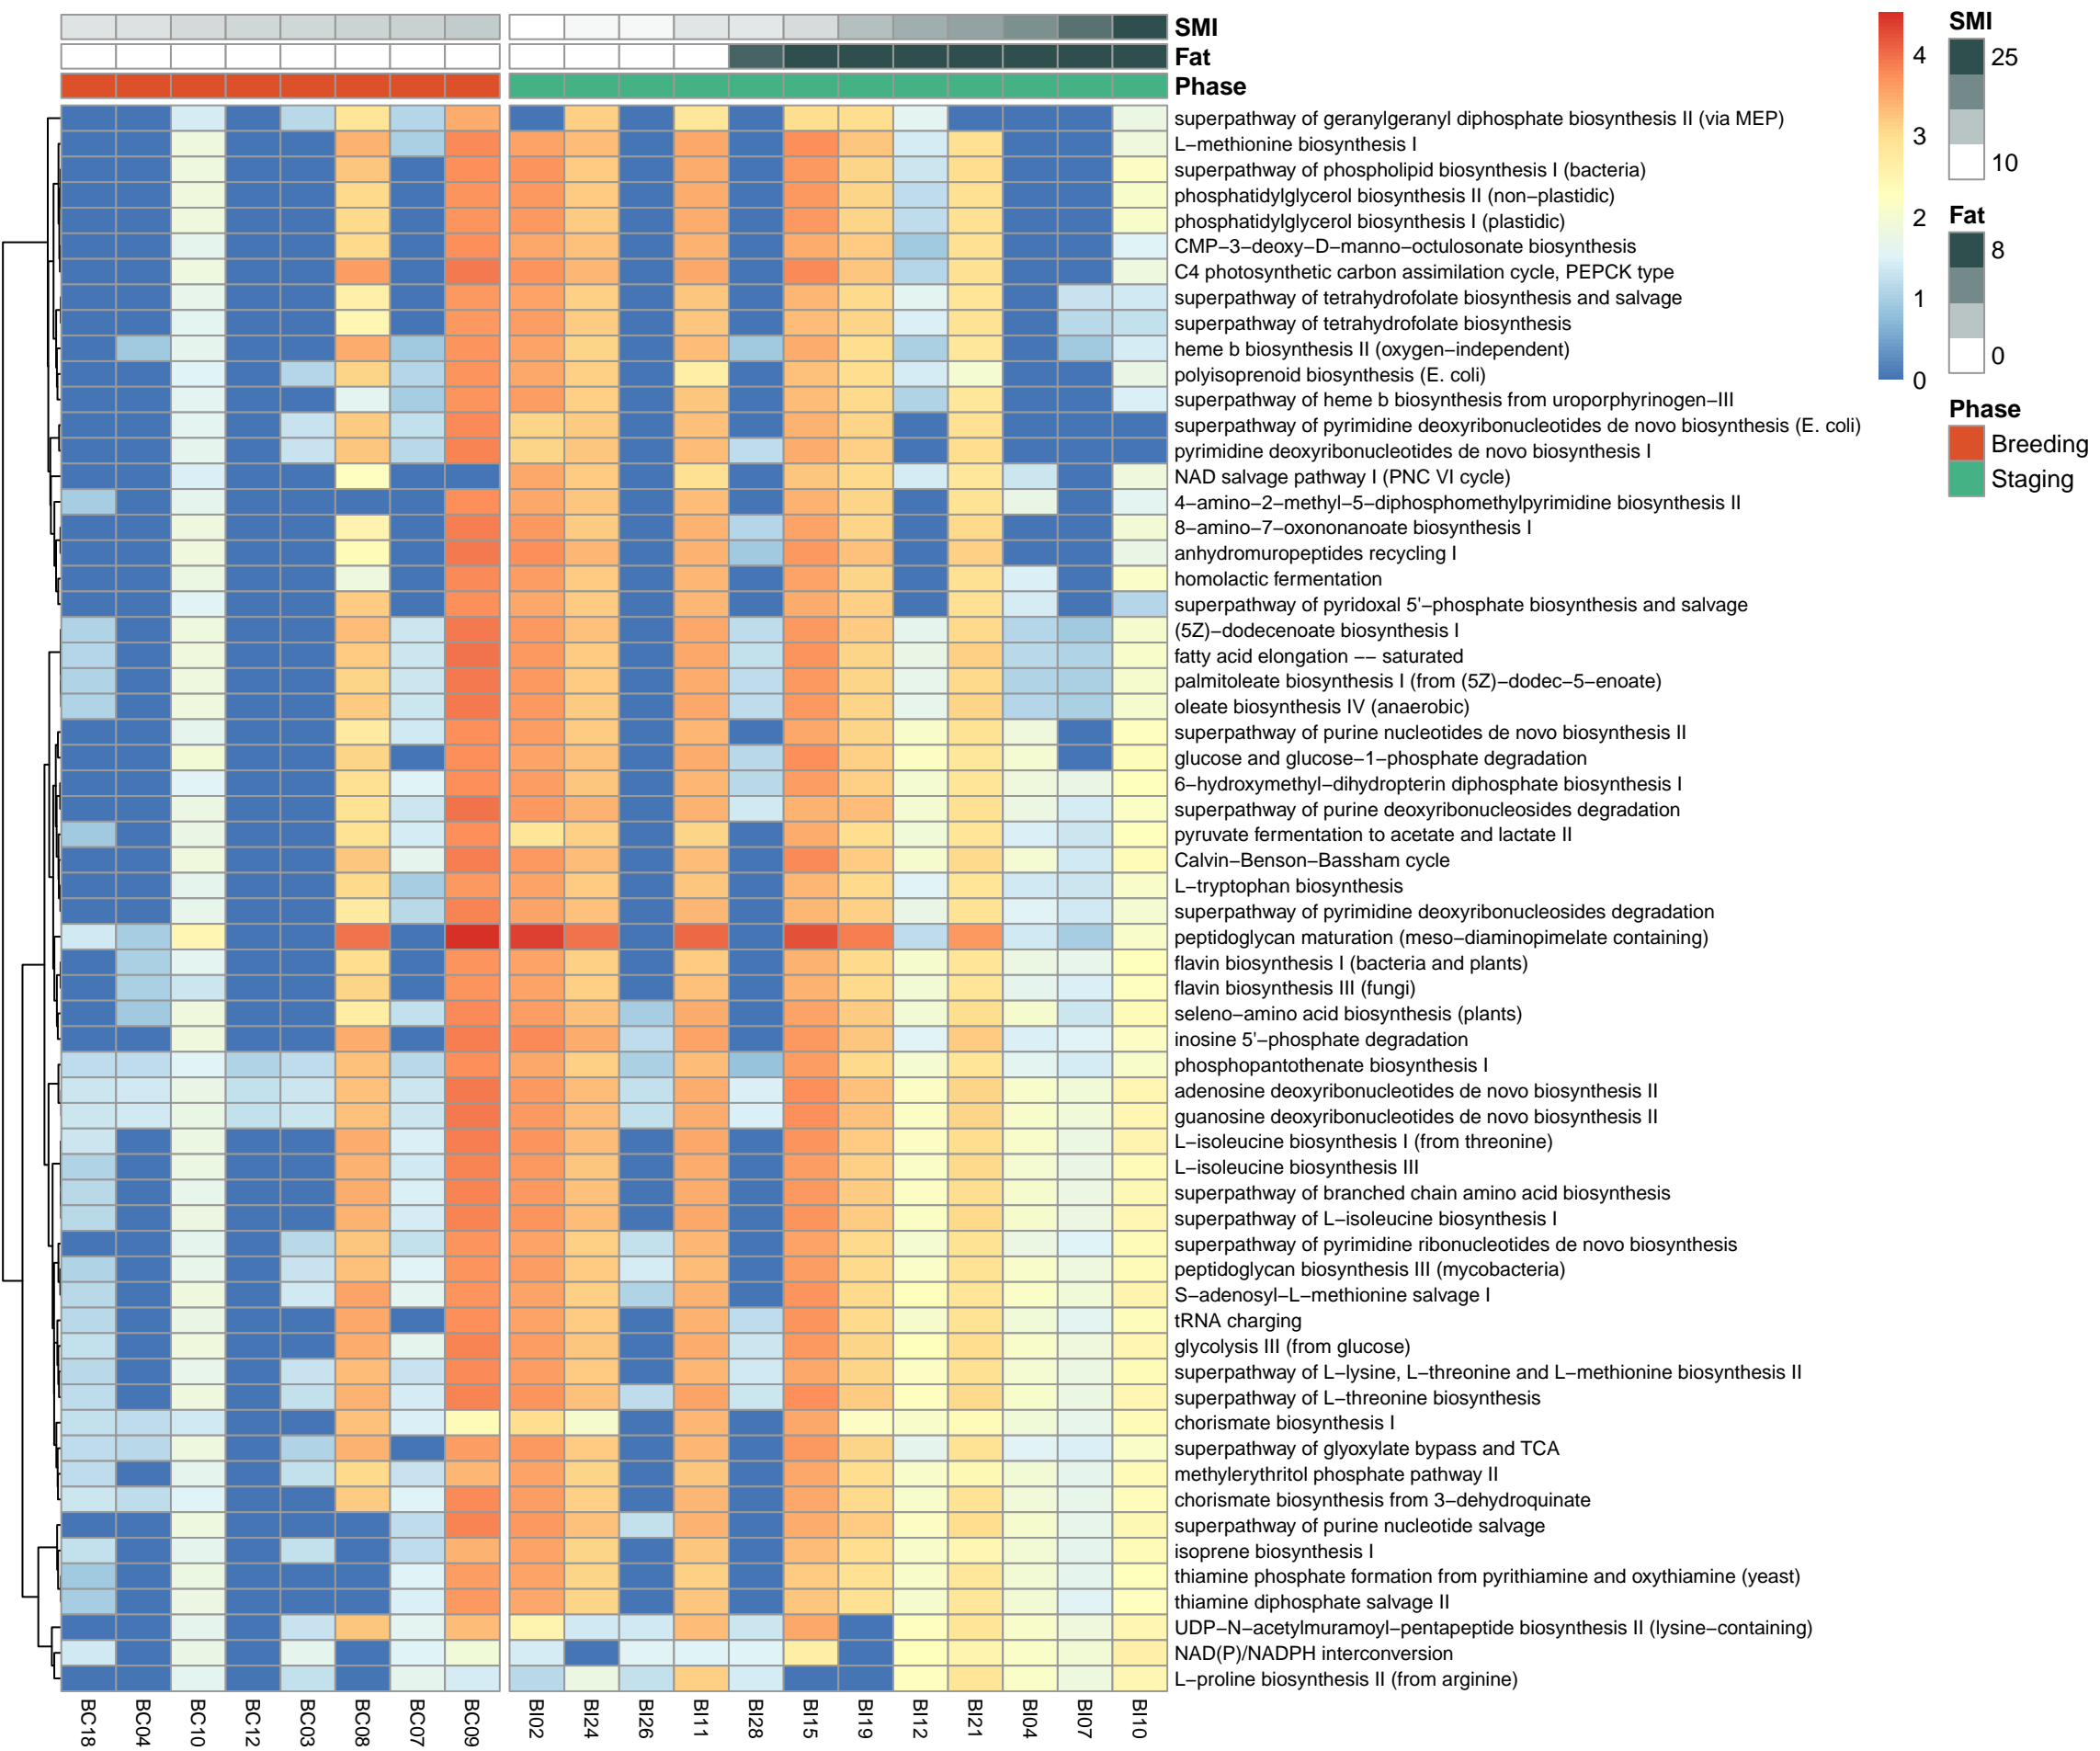

Supplement: NIHMS1931566-supplement-Fig_S3.pdf [file NIHMS1931566-supplement-Fig_S3.pdf]
